# Supplementary material
Source: publisher figshare collection journal article supplement (https://acs.figshare.com/ndownloader/files/4298200)
Supplement: Supplementary file 1 [file 4298200]

## Supporting Information

### **Improving the Carbon Resistance of Ni-based Steam Reforming Catalyst by Alloying with Rh. A Computational Study Coupled with Reforming Experiments and EXAFS Characterization**

Jiahua Guo<sup>a,b</sup>, Chao Xie<sup>a,c</sup>, Kyungtae Lee<sup>d</sup>, Neng Guo<sup>e</sup>, Jeffrey T.

Miller<sup>e</sup>, Michael J. Janik<sup>a,d\*</sup>, Chunshan Song<sup>a,b,d\*</sup>

<sup>a</sup> Clean Fuels and Catalysis Program, EMS Energy Institute, 209 Academic Projects Building, The Pennsylvania State University, University Park, PA 16802, USA

<sup>b</sup> Department of Energy & Mineral Engineering, The Pennsylvania State University, University Park, PA 16802, USA

<sup>c</sup> Department of Materials Science and Engineering, The Pennsylvania State University, University Park, PA 16802, USA

<sup>d</sup> Department of Chemical Engineering, The Pennsylvania State University, University Park, PA 16802, USA

<sup>e</sup> Chemical Sciences and Engineering Division, Argonne National Laboratory, 9700 South Cass Avenue, Argonne, IL 60439, USA

\*Corresponding author: E-mail: [csong@psu.edu](mailto:csong@psu.edu) (C.S. Song); Tel: 814-863-4466

E-mail: [mjanik@psu.edu](mailto:mjanik@psu.edu) (M.J. Janik); Tel: 814-308-3798

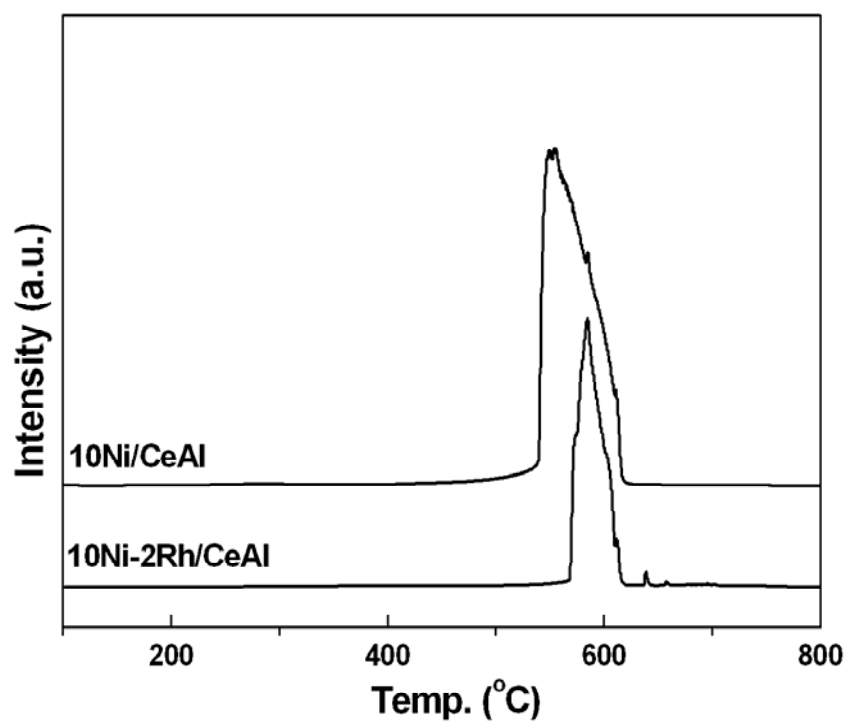

**Figure S-1. TPO profiles of used 10wt%Ni/CeAl and 10wt%Ni-2wt%Rh/CeAl catalysts after steam reforming of Norpar13 at 550 °C for 55 h.**

**Table S-1. Calculated activation energies and reaction energies for the oxidation of hydrogenated carbon (CH-O formation) and dehydrogenated carbon (C-O formation) over (111) surfaces.**

|                                               | Reaction energy (eV) | Activation energy (eV) | Relative rate * |
|-----------------------------------------------|----------------------|------------------------|-----------------|
| CH-O formation                                |                      |                        |                 |
| Ni(111)                                       | 0.096                | 1.15                   | 1.0             |
| Ni <sub>8</sub> Rh <sub>1</sub> /Ni(111)_near | 0.017                | 1.31                   | 0.10            |
| Ni <sub>8</sub> Rh <sub>1</sub> /Ni(111)_far  | 0.017                | 1.14                   | 1.2             |
| Ni <sub>2</sub> Rh <sub>1</sub> (111)         | 0.13                 | 1.14                   | 1.2             |
| Rh(111)                                       | 0.12                 | 1.37                   | 0.045           |
| C-O formation                                 |                      |                        |                 |
| Ni(111)                                       | -1.75                | 1.18                   | 1.0             |
| Ni <sub>8</sub> Rh <sub>1</sub> /Ni(111)_near | -1.83                | 1.41                   | 0.039           |
| Ni <sub>8</sub> Rh <sub>1</sub> /Ni(111)_far  | -1.72                | 1.29                   | 0.21            |
| Ni <sub>2</sub> Rh <sub>1</sub> (111)         | -1.66                | 1.16                   | 1.3             |
| Rh(111)                                       | -1.43                | 1.37                   | 0.069           |

\* at a temperature of 550 °C
